# Supplementary material for: Interface assisted synthesis of complex hydrogel particles
Source: Royal Society of Chemistry journal article supplement (doi:10.1039/c2sm26403j), 2012-01-01
Supplement: c2sm26403j.pdf [file c2sm26403j.pdf]

## Supporting Information

### Interface Assisted Synthesis of Complex Hydrogel Particles

Liang Hu,<sup>a</sup> Zeming Chen<sup>a</sup> and Michael J. Serpe<sup>\*,a</sup>

<sup>a</sup> Department of Chemistry, University of Alberta, Edmonton, AB, T6G 2G2 (Canada). Fax: 780 492 8231; Tel: 780 492 5778;  
E-mail: michael.serpe@ualberta.ca

FTIR spectra of pNIPAm hydrogel particles synthesized at high temperature is shown in Figure S1(a). The spectrum exhibits the characteristic absorption peaks at  $\sim 3310\text{ cm}^{-1}$  (N–H) and  $\sim 1650\text{ cm}^{-1}$  (C=O). Additionally, the characteristic stretching vibration peaks for  $-\text{CH}_3$ , and N–H groups can be observed at  $\sim 2970\text{ cm}^{-1}$ ,  $\sim 1530\text{ cm}^{-1}$ , respectively, confirming the structures of the pNIPAm hydrogel particles. The FTIR spectra in Figure S1(b–e) show pNIPAm hydrogel particles doped with various NPs were also successfully polymerized. Furthermore, pHEMA spectrum (Figure S1(f)) exhibits the main characteristic absorption peaks of O–H and C=O at  $\sim 3436$ ,  $\sim 1650\text{ cm}^{-1}$ , respectively, proving pHEMA hydrogel particles were successfully polymerized.

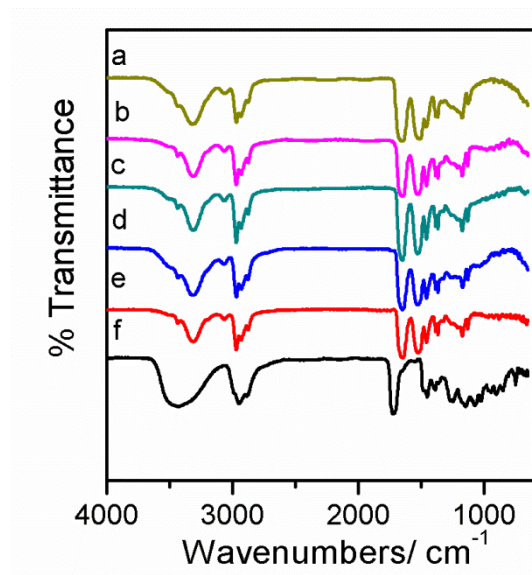

**Figure S1.** FTIR spectra of (a) pNIPAm hydrogel particles synthesized at  $65\text{ }^{\circ}\text{C}$ ; pNIPAm hydrogel particles doped with (b) Au, (c) Ag, (d) Co NPs and (e) FITC; (f) pHEMA hydrogel particles.

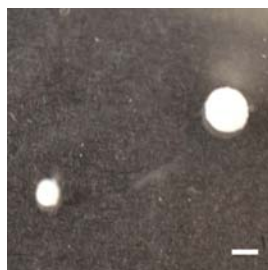

**Figure S2.** Photograph of pNIPAm hydrogel particles prepared at 65 °C at room temperature. Scale bar=1mm.
